# Supplementary material for: First Evidence of Genetic Association Between AKT2 and Polycystic Ovary Syndrome
Source: Oxford University Press journal article supplement (doi:10.2337/dc08-0532), 2008-09-04
Supplement: dc080532-sup-appendix_tables.doc [file dc080532-sup-appendix_tables.doc]

**Appendix Table A1.** Summary of previous findings of association between candidate genes and PCOS and component quantitative traits in our case-control cohort.

| **Reference number** | **Publication date** | Gene | Association |
| --- | --- | --- | --- |
| 1 | Oct 2006 | 5-reductase type 1 and type 2 (*SRD5A1* and *SRD5A2*) | Haplotypes in both genes associated with PCOS risk. Leu allele of Val89Leu (rs523349) in *SRD5A2* was protective against PCOS. *SRD5A1* haplotypes also associated withhirsutism. |
| 2 | April 2007 | Peroxisome-proliferator activated receptor gamma (PPARG) | His447His associated with decreased total and free testosterone and HOMA-IR in controls only. No associations with Pro12Ala. |
| 3 | June 2007 | Glycogen synthase kinase 3 (*GSK3B*) | Haplotypes associated with PCOS risk. |
| 4 | July 2007 | DHEA sulfotransferase (*SULT2A1*) and  Steroid sulfatase (*STS*) | *SULT2A1* variants and haplotypes associated with reduced DHEAS levels in women with PCOS. No associations with *STS*. |
| 5 | January 2008 | Type 5 17-hydroxysteroid dehydrogenase (*HSD17B5*) | No genotype-phenotype associations. |
| 6 | April 2008 (Epub) | Cytochrome P450, family 3, subfamily A, polypeptide 7 (*CYP3A7*) | Functional promoter variant associated with reduced DHEAS levels in women with PCOS. |
| 7 | May 2008 | Androgen Receptor (*AR*) | Shorter CAG repeat length was associated with PCOS risk. In subjects with non-random X-inactivation, alleles with shorter repeat were more likely to be active in PCOS. |
| 8 | May 2008 | Small glutamine-rich tetratricopeptide repeat-containing protein alpha (*SGTA*) | Haplotypes associated with PCOS risk and HOMA-IR. SNP rs1640262 was protective against PCOS. |

DHEAS=dehydroepiandrosterone sulfate; HOMA-IR= homeostasis model assessment of insulin resistance.

References

1. Goodarzi MO, Shah NA, Antoine HJ, Pall M, Guo X, Azziz R: Variants in the 5alpha-reductase type 1 and type 2 genes are associated with polycystic ovary syndrome and the severity of hirsutism in affected women. *J Clin Endocrinol Metab* 91:4085-4091, 2006

2. Antoine HJ, Pall M, Trader BC, Chen YD, Azziz R, Goodarzi MO: Genetic variants in peroxisome proliferator-activated receptor gamma influence insulin resistance and testosterone levels in normal women, but not those with polycystic ovary syndrome. *Fertil Steril* 87:862-869, 2007

3. Goodarzi MO, Antoine HJ, Pall M, Cui J, Guo X, Azziz R: Preliminary evidence of glycogen synthase kinase 3 beta as a genetic determinant of polycystic ovary syndrome. *Fertil Steril* 87:1473-1476, 2007

4. Goodarzi MO, Antoine HJ, Azziz R: Genes for enzymes regulating dehydroepiandrosterone sulfonation are associated with levels of dehydroepiandrosterone sulfate in polycystic ovary syndrome. *J Clin Endocrinol Metab* 92:2659-2664, 2007

5. Goodarzi MO, Jones MR, Antoine HJ, Pall M, Chen YD, Azziz R: Nonreplication of the type 5 17beta-hydroxysteroid dehydrogenase gene association with polycystic ovary syndrome. *J Clin Endocrinol Metab* 93:300-303, 2008

6. Goodarzi MO, Xu N, Azziz R: Association of CYP3A7*1C and Serum dehydroepiandrosterone sulfate levels in women with polycystic ovary syndrome. *J Clin Endocrinol Metab* Epub Apr 29, 2008

7. Shah NA, Antoine HJ, Pall M, Taylor KD, Azziz R, Goodarzi MO: Association of androgen receptor CAG repeat polymorphism and polycystic ovary syndrome. *J Clin Endocrinol Metab* 93:1939-1945, 2008

8. Goodarzi MO, Xu N, Cui J, Guo X, Chen YI, Azziz R: Small glutamine-rich tetratricopeptide repeat-containing protein alpha (SGTA), a candidate gene for polycystic ovary syndrome. *Hum Reprod* 23:1214-1219, 2008

Appendix Table A2. Joint analysis of genetic variants associated with PCOS in our case-control cohort.

| Independent Variables | Odds Ratio | 95% CI | P  Value |
| --- | --- | --- | --- |
| Carrier state (Y/N) for *GSK3B* risk haplotype*  Carrier state (Y/N) for *AKT2* risk haplotype*  Carrier state (Y/N) for *SRD5A1* risk haplotype*  Biallelic mean at *AR* exon 1 CAG repeat  Carrier state (Y/N) for *SRD5A2* risk haplotype*  Carrier state (Y/N) for *SGTA* risk haplotype*  Homozygosity (Y/N) for rs523349 in *SRD5A2*  Homozygosity (Y/N) for rs1640262 in *SGTA* | 2.45  2.42  2.36  0.85  1.81  7.03  0.69  0.79 | 1.31 – 4.60  1.27 – 4.61  1.17 – 4.76  0.74 – 0.98  0.74 – 4.45  0.23 – 215  0.22 – 2.14  0.035 – 84.5 | 0.0053  0.0071  0.017  0.024  0.20  0.26  0.52  0.78 |

PCOS diagnosis was the dependent variable. The logistic regression analysis also included age and BMI as independent variables.

*Carriers are homozygous or heterozygous for risk haplotype (T-G-C-T in *AKT2*; C-A-C-C-G-G-A-G-G in *GSK3B*; T-A in haplotype block 2 of *SRD5A1*, T-A-C-C-C of haplotype block A of *SRD5A2*; G-A-T in *SGTA*)
